# Supplementary material for: Complementary and divergent functions of zebrafish Tango1 and Ctage5 in tissue development and homeostasis
Source: PubMed Central journal article supplement — Mol Biol Cell. 2021 Mar 1;32(5):391–401. doi: 10.1091/mbc.E20-11-0745 (PMC8098853; doi:10.1091/mbc.e20-11-0745), 2021-03-01
Supplement: mbc-32-391-s001.pdf [file mbc-32-391-s001.pdf]

# Supplemental Materials

*Molecular Biology of the Cell*

Clark and Link

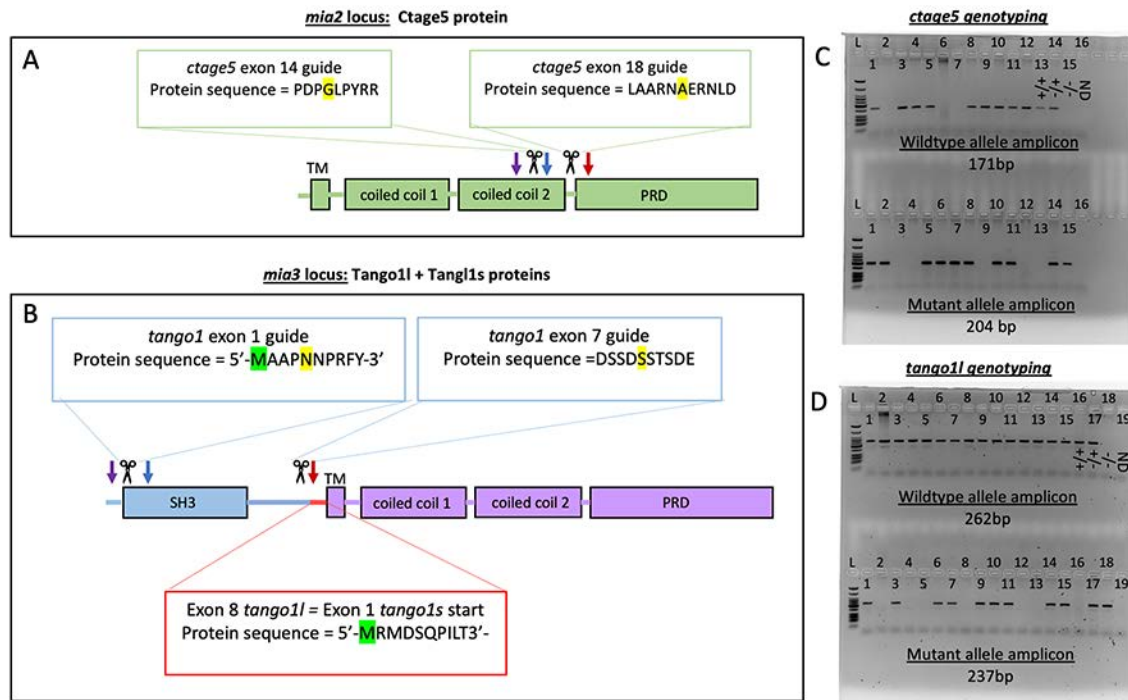

**Fig. S1: Description of Ctage5 protein from the *mia2* locus and Tango1 and Tango1s proteins from the *mia3* locus.** (A) Ctage5 is expressed from the *mia2* locus. The two guide RNAs (yellow highlight) cut a segment of DNA out that expresses the coiled coil 2 protein domain. (B) Tango1 and Tango1s are expressed from the *mia3* locus. The first guide RNA (yellow highlight) cuts around 4 amino acids after the start site (green highlight). The second guide RNA cuts in exon 7 eliminating the entire luminal domain of Tango1 (blue + purple domains). Exon 1 of Tango1s (red + purple) starts in exon 8 of Tango1 (green highlight) and is not cut by the guide RNAs. *tango1l* exon 8 is not included in the mature Tango1 protein. In A and B, the arrows represent primer locations (blue=wildtype, red=mutant, purple=shared). (C+D) Agarose gels for *ctage5* (C) and *tango1l* genotyping (D) using a low-molecular weight ladder (L) showing wildtype or mutant amplicons from numbered samples using the primers from the schematic in A (ND=no gDNA control).

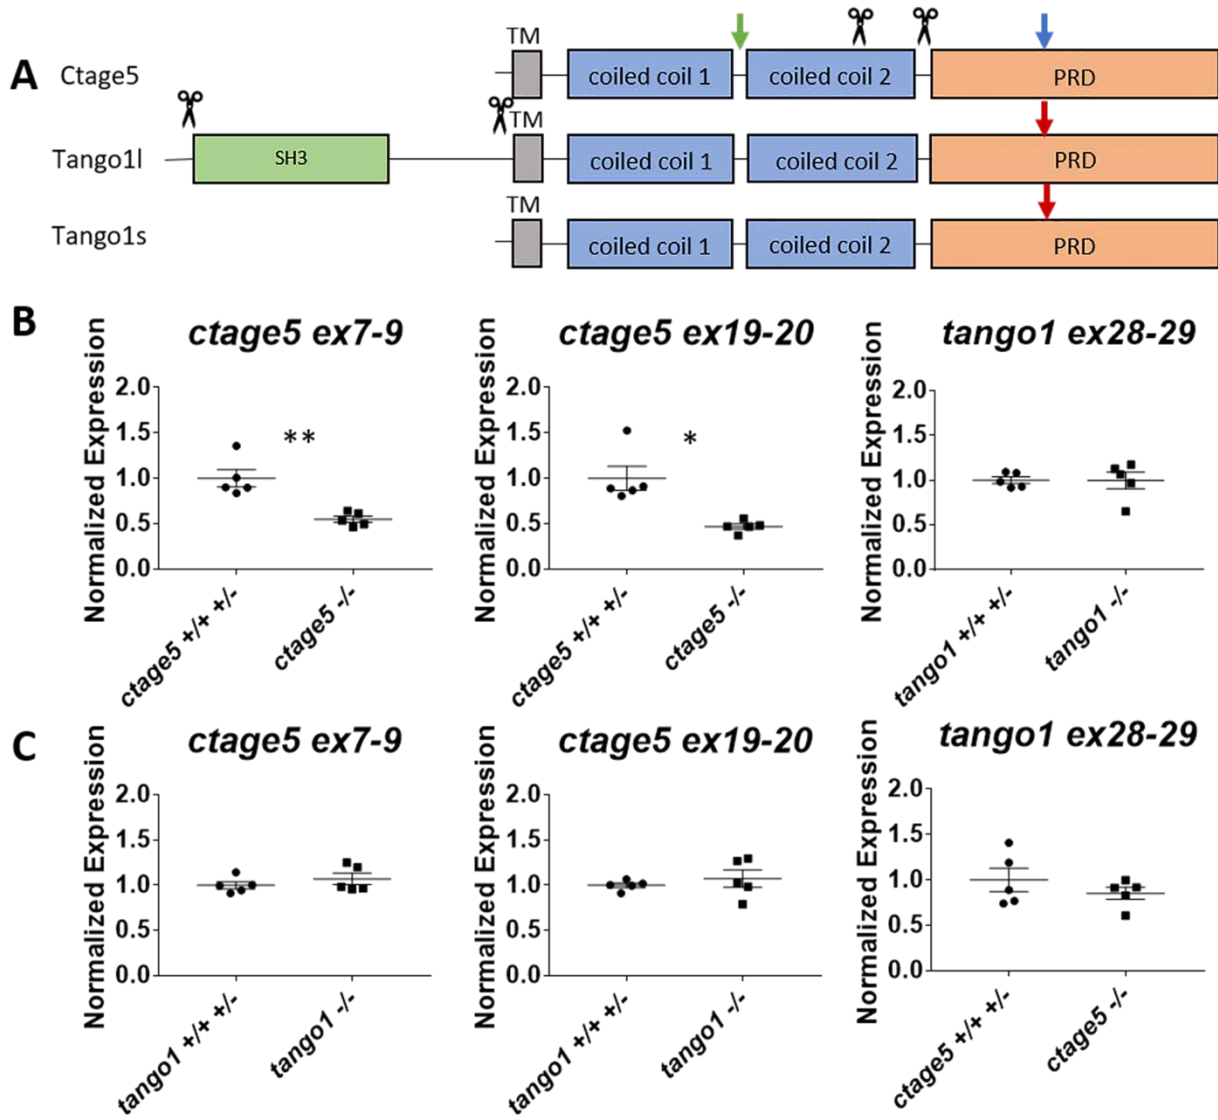

**Fig. S2: *ctage5* mutants have decreased transcript:** (A) Schematic showing large deletion cut sites (scissors), and qRT-PCR primer set locations (green arrow=*ctage5* exon 7-9; blue arrow=*ctage5* exon 19-20; red arrow=*tango1* exon 28-29). (B) qRT-PCR t-test results investigating alterations in gene expression in 7 dpf large deletion mutants compared to wildtype or heterozygous siblings using the specified primers. Welch's t-test was used to analyze statistical differences (*ctage5* ex7-9,  $p=0.0061$ ; *ctage5* ex19-20,  $p=0.0147$ ; *tango1* ex28-29,  $p=0.9716$ ) (C) qRT-PCR results investigating compensation of *ctage5* or *tango1* gene expression in 7dpf *tango1* or *ctage5* large deletion mutants respectively compared to wildtype or heterozygous siblings using the specified primers. Welch's t-test was used to analyze statistical differences (*ctage5* ex7-9,  $p=0.3762$ ; *ctage5* ex19-20,  $p=0.4954$ ; *tango1* ex28-29,  $p=0.3534$ ). \*= $p<0.05$ \*\*= $p<0.01$ .

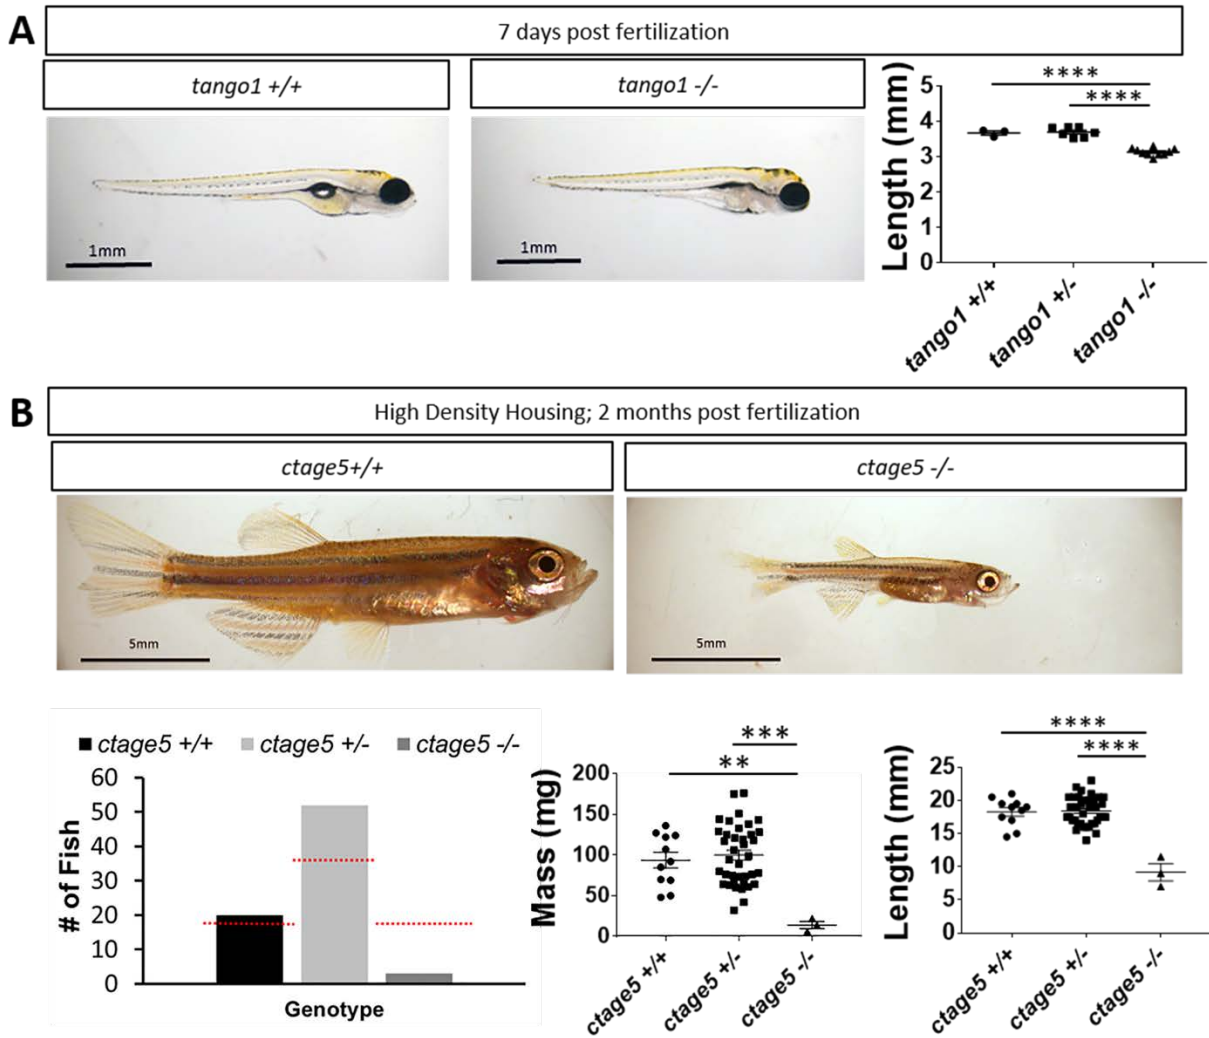

**Fig S3: Size differences in *ctage5* and *tango1* mutants.** (A) Length measurements for 7dpf embryos (one-way ANOVA,  $F=55.95$ ,  $p<0.0001$ ). (B) Representative images of *ctage5* +/+ and *ctage5* -/- 2-month-old zebrafish raised in a high density environment (about 30 fish per tank) and quantification for survival ( $\chi^2=18.92$ ,  $p<0.05$ ,  $n=75$ ), mass (one-way ANOVA,  $F=8.372$ ,  $p=0.0007$ ), and length (one-way ANOVA,  $F=26.69$ ,  $p<0.0001$ ). Red-dotted lines in represent expected survival, and bars are actual survival.

**Table S1: qPCR primer sequences.**

|                                  |                        |
|----------------------------------|------------------------|
| <b><i>ctage5</i> exon 7-9</b>    |                        |
| Primer 1                         | CTCATCTTGGCCGCTTCTAT   |
| Primer 2                         | CATCGACGGCAGCACTAATA   |
| <b><i>ctage5</i> exon 19-20:</b> |                        |
| Primer 1                         | GGCGGAGGCATTGACATTA    |
| Primer 2                         | AGAGAAGGCTCTGGAGATATGA |
| <b><i>tango1</i> exon 28-29:</b> |                        |
| Primer 1                         | AGAGGTCCAGGCGGAAA      |
| Primer 2                         | CACACATCGGCCCGTTT      |
